# Supplementary figures and images for: High surface area carbon nanofibers derived from electrospun PIM-1 for energy storage applications
Source: Royal Society of Chemistry journal article supplement (doi:10.1039/c3ta13779a), 2013-11-21

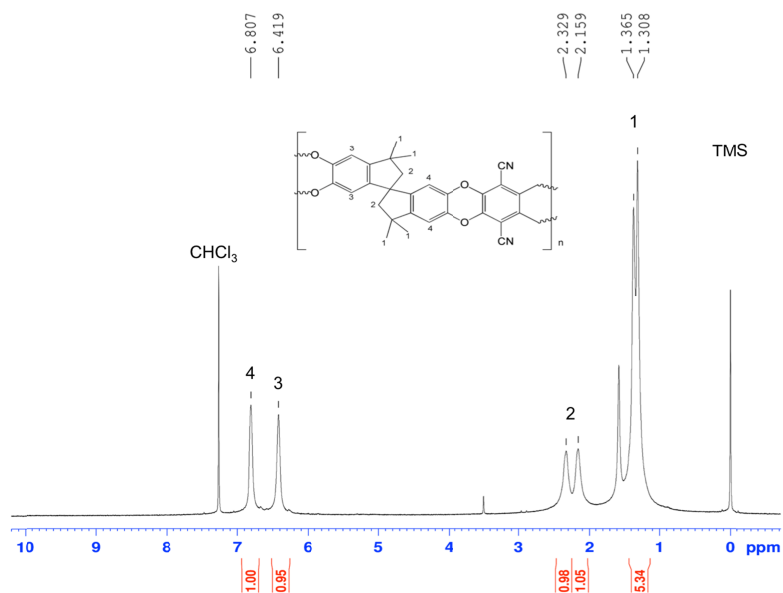

Figure S.1.  $^1\text{H}$  NMR spectrum of synthesized PIM-1

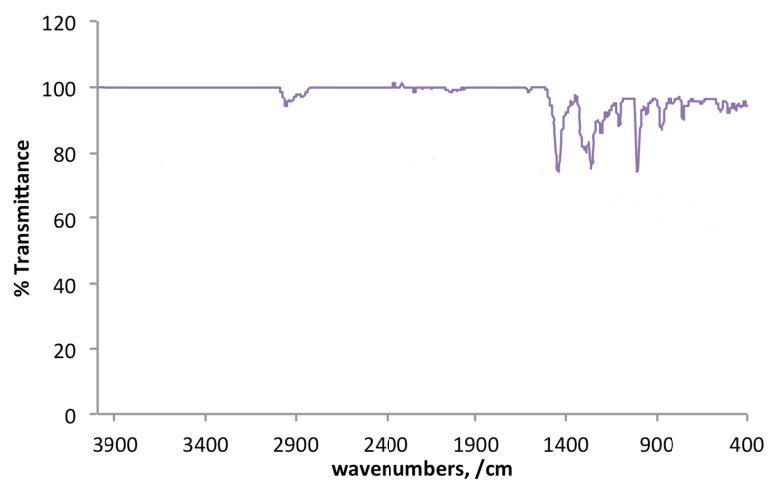

Figure S.2. IR spectrum of PIM-1

Supplement: c3ta13779a.pdf [file c3ta13779a.pdf]
